# Supplementary material
Source: publisher site journal article supplement (https://www.spandidos-publications.com/961/downloadSupplementary)
Supplement: Supplementary file 1 [file downloadSupplementary]

## Sheet: Supplementary Table 4
Table SIV. DemRNA expression information in the recruited samples
	X_EVENT	X_PATIENT	X_TIME_TO_EVENT	X_OS_IND	X_OS	ADH7	AHNAK2	CRIM1	CYP26B1	DNALI1	GABRB2	GDA	HMGA2	HNF1B	HPSE	KCNS1	PCDHGB7	RASGRF1	VGLL3	ZNF662
TCGA.EK.A2H1	0	TCGA-EK-A2H1	799	0	799	3	12.354	13.5561	9.27612	5.70044	0	8.64746	13.2955	10.3038	10.1787	12.1674	4.9542	8.41785	8.77149	8.27612
TCGA.C5.A0TN	1	TCGA-C5-A0TN	348	1	348	3.16993	12.8374	11.8994	8.32193	2.80735	0	6	12.0488	9.80413	9.89026	12.461	8.61471	9.84862	8.9542	8.32643
TCGA.UC.A7PD	1	TCGA-UC-A7PD	355	1	355	6.08746	13.0778	12.0032	10.1874	4.16993	0	2.80735	11.1787	7.25739	10.421	10.8305	6.39232	9.67243	9.85643	6.96578
TCGA.C5.A3HF	1	TCGA-C5-A3HF	543	1	543	9.21917	10.8517	12.4597	7.25739	9.56986	8.26209	10.5088	9.56224	6.72792	9.87191	11.2312	7.31288	5.88264	8.85487	9.42626
TCGA.EK.A2H0	0	TCGA-EK-A2H0	1847	0	1847	0	14.0899	12.1069	9.78627	2.80735	0	9.8392	9.13699	2.58496	9.20457	10.5575	7.21917	6.75489	8.5157	3.58496
TCGA.ZJ.A8QQ	0	TCGA-ZJ-A8QQ	2056	0	2056	0	14.0831	11.9333	9.21675	5.04439	0	9.37069	8.89178	2.58496	8.81057	10.3509	7.41785	5.67243	8.19967	3.90689
TCGA.DG.A2KH	0	TCGA-DG-A2KH	34	0	34	0	9.56415	13.3065	3.90689	13.1121	10.7202	11.5294	8.43879	11.5003	10.4533	10.0251	6.18982	4.85798	5.24793	10.0566
TCGA.DS.A0VL	0	TCGA-DS-A0VL	1692	0	1692	14.2458	12.9694	11.9672	7.55459	5.42626	3.90689	9.09011	6.16993	1	11.1536	11.7262	4.39232	7.53916	6.93074	7.64386
TCGA.JX.A3PZ	1	TCGA-JX-A3PZ	642	1	642	3.32193	10.9469	12.7669	5.90689	6.70044	1	1	6.62936	2	9.85175	6.55459	4.52356	6.64386	11.0573	6.79442
TCGA.C5.A7XC	0	TCGA-C5-A7XC	1551	0	1551	7.93664	12.1693	12.1702	10.0112	9.11114	2.32193	10.2621	6.9542	7.78136	10.5831	11.5603	6.32193	6.55459	7.49985	6.91886
TCGA.EK.A2RE	0	TCGA-EK-A2RE	57	0	57	10.5906	15.6459	12.3869	10.5632	4.75489	3	12.3202	10.5401	0	12.127	11.8944	6.24793	6.55459	7.37504	4.64386
TCGA.VS.A8Q8	1	TCGA-VS-A8Q8	978	1	978	9.11894	13.7709	10.4336	10.1098	4.16993	0	10.2796	5.45943	4.45943	10.1111	9.94251	5.2854	6.16993	5.42626	5.08746
TCGA.GH.A9DA	0	TCGA-GH-A9DA	540	0	540	0	12.8788	13.2232	8.66534	6.04439	0	6.97728	4.70044	2.58496	7.35755	9.14211	5.49185	8.45533	12.8061	7.70044
TCGA.MU.A51Y	0	TCGA-MU-A51Y	854	0	854	9.73132	13.5467	10.4818	7.74147	5.97728	2.58496	5.64386	4.32193	0	10.1712	9.55842	8.9571	5.90689	7.37504	5.93074
TCGA.EK.A2IP	0	TCGA-EK-A2IP	202	0	202	7.94251	14.0848	10.8642	8.90989	4.70044	0	5.55459	10.0593	3.16993	10.1935	11.0821	5.04439	6.64386	5.58496	5.42626
TCGA.FU.A23K	0	TCGA-FU-A23K	372	0	372	3	4.32193	10.5641	7.81378	12.3454	5.35755	3.58496	7.74147	2.58496	8.91289	6.72792	3.32193	5.32193	7.30378	5.04439
TCGA.MY.A913	0	TCGA-MY-A913	524	0	524	3	13.7761	13.3404	10.6064	4.64386	1.58496	7.44294	11.8727	9.04166	9.86882	9.20457	5.72792	9.65464	11.4853	8.98014
TCGA.FU.A2QG	0	TCGA-FU-A2QG	579	0	579	13.2592	15.2594	12.4073	10.4727	3.70044	1	10.7108	11.5646	3.80735	11.937	11.5411	4.08746	6.71425	9.56796	9.58871
TCGA.VS.A9UY	1	TCGA-VS-A9UY	555	1	555	6.87036	13.4515	10.8734	8.37938	3.90689	0	1.58496	4.80735	3.16993	10.0056	11.0485	7.66534	7.08746	4.58496	8.56986
TCGA.VS.A9V2	0	TCGA-VS-A9V2	555	0	555	11.2697	11.2715	10.7381	7.56986	5.24793	0	4.80735	7.57743	3.58496	9.21675	7.82655	7.09803	5.04439	4.9542	5.32193
TCGA.C5.A2LY	0	TCGA-C5-A2LY	2383	0	2383	2	11.5812	10.4808	6.55459	4.58496	0	5.16993	2	0	9.46557	10.8834	0	6	4.08746	8.57743
TCGA.C5.A8XK	0	TCGA-C5-A8XK	3039	0	3039	2.58496	12.3652	12.1877	9.50184	3.80735	0	7.2384	7.69349	2.32193	10.1357	11.5779	4.45943	7.18982	8.77808	9.08481
TCGA.VS.A9U7	0	TCGA-VS-A9U7	1472	0	1472	14.0517	11.8765	10.4605	8.57365	9.07948	1.58496	3.45943	6.26679	3	10.9484	12.23	5.52356	6.88264	6.18982	5.64386
TCGA.4J.AA1J	0	TCGA-4J-AA1J	542	0	542	10.774	12.8535	11.7258	9.73978	7.2854	0	4.90689	9.86882	2.32193	10.4189	8.67596	6.2854	6.44294	8.97154	9.47168
TCGA.EA.A44S	0	TCGA-EA-A44S	369	0	369	13.3892	13.1676	9.84392	7.52356	5	1.58496	9.21189	4.08746	1.58496	10.3696	10.8842	2.58496	5.12928	6.64386	8.52356
TCGA.C5.A1BL	0	TCGA-C5-A1BL	5271	0	5271	13.3726	14.9717	10.5784	7.81378	4.45943	3.80735	7.97154	6.45943	0	10.7082	11.9633	3.70044	5.35755	6.35755	3.45943
TCGA.EK.A2RL	1	TCGA-EK-A2RL	1453	1	1453	3.58496	11.2761	12.7379	6.26679	13.0721	4.9542	10.1972	8.15482	3.45943	11.0314	11.6138	4.39232	5	6.79442	10.3421
TCGA.EX.A3L1	0	TCGA-EX-A3L1	463	0	463	1	14.3082	13.6218	10.8384	5.12928	1.58496	11.1712	12.2793	10.8595	8.54689	11.0182	6.80735	10.6402	12.0241	7.49185
TCGA.FU.A5XV	0	TCGA-FU-A5XV	321	0	321	13.5272	13.9406	11.1079	10.0861	4.39232	0	11.6138	9.50779	1	11.6952	11.8242	4.32193	4.75489	8.20945	4.16993
TCGA.Q1.A5R1	0	TCGA-Q1-A5R1	474	0	474	2.32193	10.3761	11.233	5.64386	12.8431	4.32193	12.0348	8.30378	10.1911	9.84078	10.1033	4.58496	6.39232	5.61471	8.70044
TCGA.VS.A9UC	0	TCGA-VS-A9UC	825	0	825	0	13.803	11.5083	11.31	5.35755	3.45943	1	4.45943	0	9.45943	12.3457	6.24793	6.58496	8.633	7.62936
TCGA.VS.A9UQ	0	TCGA-VS-A9UQ	1263	0	1263	1	11.9159	12.4696	8.93664	13.2989	3.32193	9.82972	6.97728	7.97728	10.2808	10.5216	6.10852	7.62205	6.72792	9.03892
TCGA.EK.A2RC	0	TCGA-EK-A2RC	129	0	129	10.1886	14.1822	10.032	10.1085	8.60733	2.80735	9.55651	5.39232	6.97728	10.5147	9.57932	4.64386	5.85798	6.98868	6.2854
TCGA.FU.A770	0	TCGA-FU-A770	34	0	34	1.58496	13.1989	12.3729	8.73132	11.6179	8.43879	10.2456	7.10852	10.6689	10.9751	11.279	5.35755	7.79442	6.82018	8.08746
TCGA.MA.AA41	0	TCGA-MA-AA41	254	0	254	7.77479	13.814	11.1447	10.9513	2	0	3.58496	7.41785	2	8.73132	10.9069	2	2.58496	5.24793	2.58496
TCGA.Q1.A73S	0	TCGA-Q1-A73S	688	0	688	8.5157	12.9522	7.56224	8.56224	5.32193	1.58496	4.58496	4.80735	4.16993	9.78463	4.58496	2.32193	4.16993	6.71425	5.32193
TCGA.C5.A1BJ	0	TCGA-C5-A1BJ	4385	0	4385	12.2399	14.994	12.5297	10.983	7.08746	3.90689	11.2592	9.72281	2.80735	11.6036	13.1599	6.96578	8.19476	8.77149	6.71425
TCGA.C5.A1MP	0	TCGA-C5-A1MP	109	0	109	8.65464	12.6078	10.7599	8.82655	6.84549	0	8.82655	3.70044	3.90689	9.40727	10.9009	5.85798	8.81057	8.42206	8.34873
TCGA.DS.A7WH	0	TCGA-DS-A7WH	533	0	533	0	11.7074	14.1111	7.58496	12.9566	3.58496	10.8368	8.69697	7.33985	10.6874	9.71425	6.76818	6.96578	9.82972	9.49586
TCGA.HM.A6W2	0	TCGA-HM-A6W2	287	0	287	0	7.52356	9.99294	6.55459	11.0987	3.32193	9.47573	8.63662	11.0035	7.33092	5.85798	5.24793	10.6147	6.58496	3.58496
TCGA.RA.A741	0	TCGA-RA-A741	444	0	444	7.54689	11.643	11.8564	6.42626	5.12928	1	7.74147	5.97728	4.90689	9.47168	10.4635	5.42626	9.00562	8.73471	6.91886
TCGA.C5.A1MQ	0	TCGA-C5-A1MQ	1031	0	1031	0	11.5098	12.2091	8.31288	5.35755	0	5.49185	4.32193	1	9.95274	5.32193	3.16993	6.40939	10.5392	8.13955
TCGA.C5.A7CM	0	TCGA-C5-A7CM	619	0	619	0	9.56796	14.1497	9.20212	10.0795	2	2.80735	5.61471	2	8.05528	5.45943	5.61471	4.32193	7.43463	8.73132
TCGA.C5.A7X8	0	TCGA-C5-A7X8	83	0	83	4.75489	11.1357	11.4051	9.94251	11.1699	7.52356	10.3276	7.39232	4.16993	8.84862	4.52356	5.85798	6.20945	8.09276	7.49185
TCGA.C5.A902	0	TCGA-C5-A902	149	0	149	0	12.8659	11.1235	7.99435	3.70044	1	2.80735	3.45943	0	9.04439	11.1972	3.58496	4.45943	4.90689	2.32193
TCGA.EA.A3HS	0	TCGA-EA-A3HS	959	0	959	13.3399	14.9202	9.49985	7.93664	5.49185	2.32193	6.70044	1.58496	2.58496	10.0593	12.9526	5.2854	6.06609	7.39232	9.45738
TCGA.FU.A3YQ	0	TCGA-FU-A3YQ	861	0	861	10.0417	13.2362	10.9687	9.60363	6.16993	1.58496	12.2324	7.85175	1	11.6371	11.9491	6.53916	7.42626	8.3443	6.10852
TCGA.JW.A5VG	0	TCGA-JW-A5VG	834	0	834	1	13.3451	13.1246	8.75154	7.89482	0	3.70044	8.58496	9.57743	10.3498	9.79928	5.20945	7.96	9.75322	9.38586
TCGA.LP.A4AU	0	TCGA-LP-A4AU	343	0	343	6.89482	13.7638	11.9755	10.4686	6.24793	0	8.37938	7.88264	10.6715	9.47168	6.72792	6.18982	4.52356	8.04985	6.35755
TCGA.C5.A2LV	0	TCGA-C5-A2LV	2234	0	2234	4	13.6731	13.6545	9.77808	4.9542	1	4.52356	11.741	1	10.7423	12.6695	4.58496	6.12928	9.64205	3.45943
TCGA.C5.A8YT	1	TCGA-C5-A8YT	633	1	633	2	10.8541	11.776	6.64386	10.0238	4.24793	10.2992	9.04439	10.3476	8.56605	3.58496	8.62571	8.96578	8.76487	9.5812
TCGA.Q1.A6DV	0	TCGA-Q1-A6DV	491	0	491	3	11.1592	10.5536	7.41785	14.1616	5.70044	12.3151	7.11894	9.78627	10.9951	6.26679	4.24793	8.77808	6.16993	9.45533
TCGA.VS.A8EG	0	TCGA-VS-A8EG	1386	0	1386	11.0928	13.4251	10.2621	5.97728	5.42626	4	7.15987	1.58496	3.80735	11.3815	11.6636	4.52356	4.45943	6.58496	5.39232
TCGA.C5.A1M7	0	TCGA-C5-A1M7	1409	0	1409	9.5157	11.9252	12.2	10.6221	6.08746	0	8.3966	9.16742	3.90689	10.7364	10.6384	5.32193	8.79766	8.66888	6.30378
TCGA.C5.A2LS	0	TCGA-C5-A2LS	1345	0	1345	6.18982	7.92481	11.4656	3.70044	12.9222	5.83289	9.43045	7.7211	7.54689	10.014	10.196	2.58496	5.67243	3.58496	9.25974
TCGA.C5.A2M1	0	TCGA-C5-A2M1	1169	0	1169	2.32193	8.16491	12.2021	9.35094	13.3795	2	7.60733	7.97154	3.70044	9.93811	12.5741	6.39232	10.4419	6.76818	9.16491
TCGA.C5.A905	0	TCGA-C5-A905	4879	0	4879	12.0098	13.8766	9.57365	8.01681	7.88264	1.58496	8.06609	9.89026	2	10.7022	11.6036	3	5.16993	10.4419	9.04985
TCGA.IR.A3L7	0	TCGA-IR-A3L7	4483	0	4483	13.3428	13.1793	12.0868	5.78136	5.88264	3.16993	6.53916	6.26679	1.58496	11.1053	5.2854	5.80735	5.70044	9.46352	6.16993
TCGA.JW.A5VL	0	TCGA-JW-A5VL	474	0	474	2	11.7891	10.6917	8.99718	5.16993	1	0	3.16993	0	10.3376	9.90238	4.24793	5.39232	4.45943	4
TCGA.JX.A5QV	0	TCGA-JX-A5QV	636	0	636	10.716	12.4476	12.3515	8.53138	2	3.70044	5.61471	7.97154	2.58496	10.9513	9.01402	6.93074	4.9542	4.58496	8.31288
TCGA.Q1.A73O	0	TCGA-Q1-A73O	428	0	428	6.52356	13.5576	11.4424	9.34651	7.20945	1.58496	6.14975	7.53916	3	9.15735	8.36194	4.75489	4.64386	7.11894	5
TCGA.C5.A2LT	0	TCGA-C5-A2LT	2226	0	2226	3.32193	13.5997	15.1757	9.68825	6.12928	1	9.56224	11.2058	5.2854	7.80735	10.7474	5.16993	12.0461	12.6768	8.40514
TCGA.EA.A556	0	TCGA-EA-A556	453	0	453	0	11.3049	12.0423	9.59805	11.3767	5.24793	10.8001	13.166	4.90689	7.22882	6.40939	7.36632	5.88264	8.224	8.95128
TCGA.FU.A40J	0	TCGA-FU-A40J	426	0	426	1.58496	11.4168	13.0439	7.57743	12.9469	4	12.0788	6.45943	11.1189	10.7773	11.4388	7.18982	9.12412	7.88264	10.0084
TCGA.HG.A2PA	1	TCGA-HG-A2PA	773	1	773	14.2978	14.7374	12.3078	8.12928	10.1434	3.70044	12.388	10.2796	8.78136	11.716	10.7465	6.71425	7.96578	8.19967	6.53916
TCGA.VS.A8EI	0	TCGA-VS-A8EI	729	0	729	11.1504	12.3699	12.0126	11.1273	5.55459	0	8.77479	10.978	1.58496	10.6618	12.4481	4.85798	9.59805	6.18982	8.93958
TCGA.VS.A8EL	0	TCGA-VS-A8EL	1992	0	1992	9.27845	12.6477	10.4388	9.26679	5.35755	0	2.32193	7.62936	3.45943	10.9211	3.80735	4.52356	7.8009	5.67243	5.04439
TCGA.VS.A94Z	0	TCGA-VS-A94Z	1015	0	1015	7.07682	12.4622	10.8903	8.93369	5.24793	1	4.52356	6.67243	2	11.2633	9.71596	5.67243	4.75489	10.7591	4.45943
TCGA.ZJ.A8QR	1	TCGA-ZJ-A8QR	582	1	582	8.42626	12.6168	11.3987	9.60177	3.45943	1	11.1026	9.16491	4.75489	11.785	11.7309	4.39232	7.87036	7.01123	3.45943
TCGA.C5.A8XH	1	TCGA-C5-A8XH	1394	1	1394	5.24793	13.4713	11.1293	9.43671	5.52356	0	3.58496	5.67243	3.80735	10.3443	10.9535	4.08746	9.37069	7.30378	9.33985
TCGA.EA.A5O9	0	TCGA-EA-A5O9	788	0	788	6.08746	12.5085	11.0741	5.70044	4.52356	0	2.32193	2	0	11.1693	9.54689	3.32193	6.26679	5.08746	8.35755
TCGA.VS.A94W	0	TCGA-VS-A94W	1243	0	1243	6.12928	10.8673	10.9643	10.4818	6.45943	1.58496	7.36632	3.90689	4.85798	8.05528	9.76321	5.70044	5.93074	5.12928	5.42626
TCGA.VS.A9UM	1	TCGA-VS-A9UM	829	1	829	12.4344	13.9171	9.74483	8.37069	7.12928	0	4.75489	2.58496	1	10.8826	12.1402	5.72792	5.12928	6.70044	6
TCGA.C5.A1ME	0	TCGA-C5-A1ME	1756	0	1756	2.32193	11.3309	11.3945	6.70044	12.8194	5.75489	11.3565	9.47168	4.70044	8.17493	3	2	5.04439	4.52356	8.96578
TCGA.EA.A3Y4	0	TCGA-EA-A3Y4	1122	0	1122	0	13.5163	12.2399	6.91886	8.07682	1	7.59246	4.39232	4.85798	8.63662	4.58496	2	6.72792	9.85487	9.87191
TCGA.EA.A5ZD	0	TCGA-EA-A5ZD	830	0	830	10.5603	12.6264	9.89785	7.46761	7.15987	2	1	6.55459	2.32193	10.0403	8.21917	7.87036	7.20945	6	4.9542
TCGA.EK.A2RM	0	TCGA-EK-A2RM	50	0	50	9.94691	11.8619	12.8469	9.32418	6.42626	8.13443	6.08746	6.44294	5.24793	8.46761	10.0196	5.24793	8.76155	8.65105	8.34873
TCGA.HM.A3JJ	1	TCGA-HM-A3JJ	659	1	659	12.5355	13.7852	12.2729	9.53916	6.32193	1	8.71768	6.76818	2	10.0512	12.7288	6.37504	7.05528	8.48784	8.90087
TCGA.IR.A3LC	0	TCGA-IR-A3LC	3935	0	3935	13.4721	11.9751	12.3729	9.27146	6.06609	4	4.70044	3.45943	7.14975	11.2342	11.9118	4.39232	7.69349	5.78136	5.2854
TCGA.JX.A3Q8	0	TCGA-JX-A3Q8	1357	0	1357	1	6.04439	11.2003	8.67948	11.9719	3.16993	11.2306	4.08746	3	12.5241	8.14466	3	9.66356	3.45943	6.22882
TCGA.VS.A94X	1	TCGA-VS-A94X	506	1	506	3.45943	13.2018	13.0049	7.72792	3.70044	0	8.20945	9.65821	3.32193	9.24555	7.76818	4.45943	7.09803	10.0674	4.08746
TCGA.C5.A8ZZ	0	TCGA-C5-A8ZZ	636	0	636	13.2403	13.2633	11.5396	10.1331	6.06609	3.16993	11.713	8.224	0	10.1561	11.0224	7.13955	4.39232	10.0755	7.39232
TCGA.DS.A7WF	1	TCGA-DS-A7WF	492	1	492	0	12.5627	10.5859	8.05528	11.4666	5.80735	3	8.54303	2	10.6312	8.41363	7	8.72451	7.07682	9.50978
TCGA.EX.A69L	0	TCGA-EX-A69L	602	0	602	1	11.4893	11.9106	8.75154	4.32193	1	0	2.80735	2.80735	10.3912	10.3309	4.9542	10.1548	7.02237	7.22882
TCGA.VS.A8EB	1	TCGA-VS-A8EB	305	1	305	0	13.7637	11.2825	6.42626	3	1.58496	3.16993	3.16993	0	8.39232	11.0196	3.16993	5.08746	10.8106	9.39874
TCGA.XS.A8TJ	0	TCGA-XS-A8TJ	890	0	890	13.9495	13.0435	11.1768	8.81057	5.20945	1.58496	9.35975	8.37938	2	9.98442	10.8657	5.39232	4.75489	7.62205	5.9542
TCGA.C5.A1MN	1	TCGA-C5-A1MN	1245	1	1245	11.8781	13.7583	12.3971	10.6064	4.39232	1	6.9542	13.3359	2.32193	11.4507	12.0244	4.85798	7.83289	9.90539	3
TCGA.C5.A7CJ	1	TCGA-C5-A7CJ	3097	1	3097	9.8392	13.8283	10.9388	9.40727	7.03342	2.32193	8.02791	5.70044	5.12928	9.31967	10.4939	6.08746	5.2854	8.73809	7.45943
TCGA.C5.A7UI	1	TCGA-C5-A7UI	2888	1	2888	10.6935	11.3794	8.224	7.22882	6.06609	0	4.58496	3	7.56224	8.32193	8.03342	3.16993	4	5.12928	4.64386
TCGA.EX.A449	0	TCGA-EX-A449	447	0	447	1	10.1636	9.32867	7.78136	12.169	1.58496	8.53916	3	7.90087	8.61471	9.21189	3.58496	5.61471	3.16993	8.35755
TCGA.JW.A852	1	TCGA-JW-A852	252	1	252	11.9679	10.6411	8.12928	3.70044	4.39232	0	6.30378	7.67948	2	8.72792	9.93811	0	2.80735	2	3
TCGA.MY.A5BE	0	TCGA-MY-A5BE	1066	0	1066	9.21917	8.09803	10.2527	8.18488	5.64386	1.58496	2.58496	1	1	10.5459	8.54689	3.90689	6.32193	6.71425	5.16993
TCGA.R2.A69V	0	TCGA-R2-A69V	596	0	596	4	11.0126	11.6707	7.63662	6.71425	0	4.52356	6.10852	4.45943	8.96867	6.44294	3.32193	6.53916	7.26679	6.33985
TCGA.VS.A8QF	0	TCGA-VS-A8QF	1800	0	1800	8.00562	12.8609	11.3287	9.77808	4.58496	0	3	2.80735	2.80735	9.69523	11.6618	4.24793	8.16491	5.80735	10.0993
TCGA.VS.A950	0	TCGA-VS-A950	1221	0	1221	1	13.5772	11.5962	9.69	4.64386	1	5.52356	6.26679	2.32193	8.98584	11.0133	4.64386	4.85798	6.98868	5.70044
TCGA.VS.A9UU	0	TCGA-VS-A9UU	442	0	442	12.3396	13.0617	9.92184	7.93664	3.45943	0	9.1267	7.06609	1	10.2155	11.2912	2.58496	3.58496	3.16993	5.64386
TCGA.C5.A1M8	0	TCGA-C5-A1M8	919	0	919	10.2609	13.501	9.34873	6.6865	5.70044	2.58496	5.55459	5.35755	3.45943	11.3778	10.5565	3.16993	6.62936	7.85175	4.80735
TCGA.C5.A7CH	0	TCGA-C5-A7CH	4694	0	4694	8.27146	14.1623	11.0761	11.0375	4.9542	1	5.67243	9.68825	1	10.9527	10.9672	4.32193	6.85798	6.10852	7.35755
TCGA.DS.A7WI	1	TCGA-DS-A7WI	252	1	252	0	10.5859	10.9816	6.55459	3.90689	1.58496	9.65642	4.16993	11.6667	10.062	10.9084	3.58496	9.06609	9.50383	9.12928
TCGA.EA.A3HU	0	TCGA-EA-A3HU	1013	0	1013	2.32193	12.8667	10.4949	8.42626	5.88264	0	3.45943	1.58496	2	12.3373	9.9629	6.37504	5.35755	7.01123	6.96578
TCGA.EA.A43B	0	TCGA-EA-A43B	791	0	791	0	10.0821	11.7899	8.224	4.70044	1.58496	6.79442	5.12928	4.39232	9.62205	11.4184	2	9.98726	10.0126	8.14466
TCGA.FU.A3WB	0	TCGA-FU-A3WB	491	0	491	3.32193	12.8946	11.7013	7.69349	5.67243	1.58496	2.32193	9.4818	0	11.6948	10.8439	4.9542	4.90689	6.58496	9.50383
TCGA.JW.A5VK	0	TCGA-JW-A5VK	623	0	623	12.3154	11.8094	9.04439	4.9542	4.24793	0	3.16993	8.65821	2.32193	8.88874	7.76155	0	0	0	3
TCGA.MA.AA3Z	0	TCGA-MA-AA3Z	595	0	595	13.4756	13.76	9.3966	8.07682	1.58496	1	9.14466	8.43879	1	10.7773	10.1624	4.16993	3.45943	3.80735	4
TCGA.PN.A8MA	0	TCGA-PN-A8MA	90	0	90	8.85175	7.62205	11.1196	7.94837	12.0478	3.32193	9.47776	8.38802	1	9.63844	8.5812	5.55459	4.85798	6.67243	5.16993
TCGA.VS.A9UO	0	TCGA-VS-A9UO	1456	0	1456	0	9.28309	12.8246	4.75489	12.1589	6.47573	12.6649	0	10.2131	10.4949	11.0647	2	3.70044	3.90689	11.0761
TCGA.VS.A9UP	0	TCGA-VS-A9UP	1444	0	1444	3	9.9901	12.2438	8.55459	10.3174	8.90989	4.45943	10.2312	3.32193	9.26679	9.01681	5.12928	9.71253	6.42626	5.67243
TCGA.C5.A3HE	0	TCGA-C5-A3HE	548	0	548	0	9.67596	11.1007	8.25739	5.67243	1.58496	8.74483	5.72792	10.7599	8.96578	5.04439	5.32193	4.39232	6.45943	8.65464
TCGA.C5.A901	0	TCGA-C5-A901	518	0	518	8.61471	13.959	10.8603	12.0805	5.52356	1.58496	8.83289	6.10852	1	10.6777	9.22159	6.71425	5.39232	8.66888	5.93074
TCGA.EK.A2PI	0	TCGA-EK-A2PI	586	0	586	14.9988	15.6566	11.2533	7.24793	4.16993	6.79442	9.63481	6.67243	1	11.2246	11.1799	4.32193	6.42626	7.31288	5.88264
TCGA.EX.A8YF	0	TCGA-EX-A8YF	473	0	473	0	10.5812	11.5367	6.94251	5.55459	2.32193	8.24793	0	10.4615	10.1124	1.58496	7.06609	4.16993	7.37504	6.37504
TCGA.JW.A69B	0	TCGA-JW-A69B	863	0	863	0	7.40939	12.2098	6.97728	12.8775	10.4409	12.6312	8.63662	12.8514	10.3902	11.5755	5.39232	6.40939	7.26679	10.5068
TCGA.Q1.A6DW	0	TCGA-Q1-A6DW	534	0	534	7.37504	14.2474	10.0293	8.46352	6.14975	1	8.65464	4.58496	2.58496	10.4502	11.8009	5.2854	5.04439	7.03342	8.5812
TCGA.UC.A7PF	1	TCGA-UC-A7PF	2859	1	2859	10.2935	13.4384	10.6384	6.98868	4.32193	1.58496	10.0224	5.85798	2.80735	10.6812	10.5746	4.75489	5.16993	7.62936	4.9542
TCGA.UC.A7PG	1	TCGA-UC-A7PG	370	1	370	10.6211	14.578	10.6511	9.57175	5.39232	2	6.56986	5.85798	4	9.15735	10.8138	6.10852	4.58496	7.65821	6.79442
TCGA.UC.A7PI	0	TCGA-UC-A7PI	2114	0	2114	0	7.91886	12.7694	5.78136	12.3818	8.14466	11.0855	9.23601	6.35755	10.0768	5.75489	5.2854	4.70044	4.80735	10.1874
TCGA.VS.A8QA	0	TCGA-VS-A8QA	1099	0	1099	9.39446	10.7279	12.7155	5.61471	11.1855	1	3.80735	7.40088	3.32193	10.3185	11.4409	1	6.16993	1.58496	7.76818
TCGA.C5.A7UE	0	TCGA-C5-A7UE	4738	0	4738	11.5018	13.0679	8.27146	8.24793	4	1	11.4025	6.04439	4	10.6917	11.0389	2	3.16993	4.39232	4.16993
TCGA.DS.A0VK	1	TCGA-DS-A0VK	1118	1	1118	14.7088	14.8561	12.4747	9.82496	5.52356	2	11.1793	11.144	1	12.0941	12.5467	5.35755	4.9542	5.52356	5.24793
TCGA.DS.A1OB	1	TCGA-DS-A1OB	861	1	861	5.42626	11.2574	10.4605	7.18982	4.90689	10.1434	4.39232	3.58496	1	8.74147	8.20457	4.39232	4.90689	12.42	4
TCGA.EA.A3QE	0	TCGA-EA-A3QE	761	0	761	13.4981	15.0654	11.8792	9.48985	5.20945	1	12.7505	7.92481	2	12.8283	11.7095	5.12928	5.52356	6.49185	5.67243
TCGA.EA.A50E	1	TCGA-EA-A50E	227	1	227	13.8823	13.0658	10.2021	8.7879	5.16993	3.32193	6.45943	7.44294	2	8.38802	11.1542	5	4.24793	8.79116	4.90689
TCGA.EK.A2RN	0	TCGA-EK-A2RN	71	0	71	9.9542	14.8787	7.74819	7.80735	3.58496	2	2	3.58496	0	7.16993	7.07682	6	4.16993	3.90689	3.90689
TCGA.FU.A3NI	1	TCGA-FU-A3NI	638	1	638	11.0895	13.0405	11.2003	10.5392	5.49185	1	2.80735	6.52356	1.58496	9.97441	11.7977	6.2854	6.08746	8.03342	6.18982
TCGA.JW.A5VI	0	TCGA-JW-A5VI	747	0	747	0	13.3151	11.8313	8.60733	5.04439	0	4.39232	4.90689	1	10.9556	9.94837	4.90689	7.53138	8.40939	5.24793
TCGA.LP.A4AX	0	TCGA-LP-A4AX	380	0	380	4.08746	12.6834	14.3434	9.46761	4.24793	1	5.12928	5.55459	2	10.9121	11.1408	5.88264	6.79442	11.584	4.85798
TCGA.Q1.A73P	0	TCGA-Q1-A73P	483	0	483	3	11.3021	12.7744	6.49185	11.6983	6.20945	11.0668	4.39232	8.15987	10.5718	4.52356	4.90689	5.45943	6.33985	7.56224
TCGA.Q1.A73R	0	TCGA-Q1-A73R	567	0	567	1	12.7313	12.5372	9.90087	12.4681	4.52356	4.64386	9.74483	4	10.8533	10.2958	5.85798	6.45943	6.52356	10.5353
TCGA.C5.A1M9	1	TCGA-C5-A1M9	1065	1	1065	0	13.318	12.6784	9.75989	12.8078	1	11.9979	9.35535	11.2033	10.8122	9.96578	4.90689	9.40514	6.72792	9.66711
TCGA.DG.A2KM	0	TCGA-DG-A2KM	1946	0	1946	13.4794	14.272	12.2067	8.0607	7.29462	1	8.79442	8.24317	2.58496	10.7177	10.6092	7.08746	8.08215	9.56033	6.56986
TCGA.DS.A3LQ	0	TCGA-DS-A3LQ	699	0	699	15.6853	12.6266	12.6013	9.87344	6.16993	0	11.7461	7.62205	2	12.0091	11.3163	5.90689	5.20945	8.85798	4.32193
TCGA.EA.A1QS	0	TCGA-EA-A1QS	1203	0	1203	5.58496	13.2747	12.0451	5.70044	6.89482	5.04439	2	10.6027	1.58496	9.34651	8.65105	6.49185	10.3354	10.8895	9.11374
TCGA.JW.AAVH	0	TCGA-JW-AAVH	552	0	552	12.233	13.7681	10.375	5.04439	8.20457	2	6.97728	7.93664	2.32193	10.6804	9.92926	3.32193	3	7.53916	8.26679
TCGA.MU.A8JM	0	TCGA-MU-A8JM	607	0	607	10.2597	13.2417	10.9099	9.67243	4.80735	2.80735	8.61471	8.29921	3.45943	11.6631	10.1202	3.90689	4.80735	7.15987	6.80735
TCGA.Q1.A73Q	0	TCGA-Q1-A73Q	284	0	284	14.3123	13.9337	11.3971	7.58496	4	2.58496	10.865	5.88264	1	11.4828	6.2854	4.32193	4.16993	5.78136	4.16993
TCGA.VS.A958	0	TCGA-VS-A958	1525	0	1525	0	12.6782	11.2586	7.21917	4	1	5.32193	2.32193	1	8.55459	11.6307	4	4.75489	4.90689	7.21917
TCGA.VS.A9V1	1	TCGA-VS-A9V1	157	1	157	0	8.38802	10.8218	5.61471	11.6631	3.32193	10.5157	6.37504	4	8.05528	2.80735	2.58496	2.58496	4.16993	8.75154
TCGA.C5.A907	0	TCGA-C5-A907	448	0	448	1	14.5256	11.6193	8.57743	4.52356	0	9.00843	4.24793	10.5897	6.64386	10.1849	3.32193	3.80735	10.4147	10.0661
TCGA.DS.A0VN	0	TCGA-DS-A0VN	2910	0	2910	9.71596	13.2125	11.8293	11.0348	6.06609	1.58496	2.58496	10.268	1.58496	11.2088	9.99435	5.80735	8.42206	8.10329	5.45943
TCGA.DS.A1OC	0	TCGA-DS-A1OC	376	0	376	8.9629	12.0974	11.7254	9.46557	5.32193	1.58496	8.96867	4.64386	4.24793	9.89936	12.1472	4.24793	7.67948	7.35755	3
TCGA.EA.A1QT	0	TCGA-EA-A1QT	1243	0	1243	12.8711	12.7415	12.1951	7.59246	6.32193	0	10.7773	10.0701	1.58496	10.7313	9.95565	3.80735	3.70044	6.22882	4.80735
TCGA.FU.A3HY	0	TCGA-FU-A3HY	954	0	954	13.942	15.314	13.1787	11.0369	3.32193	1.58496	11.1163	10.697	3.32193	12.0771	12.4745	4.08746	6.14975	6.18982	3.70044
TCGA.VS.A8QM	1	TCGA-VS-A8QM	951	1	951	11.1874	13.4795	11.7756	8.86109	6.65821	4.39232	5.97728	5.04439	4.08746	9.63844	11.1966	7.2384	6.40939	8.74483	7.48382
TCGA.VS.A94Y	1	TCGA-VS-A94Y	144	1	144	0	12.2366	12.7271	9.2854	3.80735	2	6.16993	10.8611	1	9.54303	5.20945	3.80735	5.55459	6.67243	4.52356
TCGA.BI.A0VS	0	TCGA-BI-A0VS	1735	0	1735	4.85798	14.9732	13.1331	9.58496	6.59991	1	6.75489	13.2815	4.08746	10.1724	12.4038	6.47573	5.72792	11.2609	6.50779
TCGA.C5.A7CL	1	TCGA-C5-A7CL	471	1	471	6.91886	14.7192	10.1059	8.06609	5.45943	1.58496	10.5008	5.32193	2.58496	9.7364	11.0498	5.2854	4.32193	7.2384	5.45943
TCGA.C5.A7UC	1	TCGA-C5-A7UC	523	1	523	4.39232	13.0512	13.4759	9.55075	4.39232	0	8.20945	11.0375	3.90689	8.93074	8.93664	8.69349	7.87036	11.7394	6.45943
TCGA.EK.A2IR	0	TCGA-EK-A2IR	3442	0	3442	16.5801	11.964	12.1755	9.3443	4.24793	0	10.6662	11.9388	0	12.3399	1.58496	5.45943	1.58496	7.19967	8.76155
TCGA.EK.A2R8	0	TCGA-EK-A2R8	44	0	44	0	13.957	11.0821	8.89785	6.74147	1	6	11.851	2	8.88264	6.65821	6.26679	3.16993	6.85798	4.70044
TCGA.IR.A3LI	0	TCGA-IR-A3LI	2493	0	2493	5	9.62205	10.5362	2.80735	11.7985	7.5157	8.83605	6.89482	2.80735	10.1383	8.56224	2.32193	4.58496	5.42626	8.28077
TCGA.MA.AA3Y	0	TCGA-MA-AA3Y	542	0	542	1	12.8927	12.7593	10.4522	4.45943	0	1	10.9866	1.58496	9.74315	8.49985	5.80735	6.32193	11.6676	6.02237
TCGA.MA.AA43	0	TCGA-MA-AA43	346	0	346	7.04439	12.6209	11.224	10.0307	8.22882	2.32193	3	12.0694	3.80735	8.18488	7.74147	7.53916	10.0224	7.10852	8.84549
TCGA.BI.A20A	0	TCGA-BI-A20A	720	0	720	12.4333	12.5068	12.8406	5.12928	5.78136	1.58496	5.16993	7.31288	3	10.1254	6.40939	5.67243	7.67948	6.6865	6.22882
TCGA.C5.A1MF	0	TCGA-C5-A1MF	1617	0	1617	4.58496	9.18735	10.2842	7.57743	4.52356	3.16993	4.45943	4.16993	1.58496	7.46761	6.22882	1.58496	2.58496	5.35755	7.16993
TCGA.C5.A1ML	1	TCGA-C5-A1ML	636	1	636	6.18982	13.1872	11.5216	6.33985	6.75489	8.78136	7.80735	10.9039	3	10.6402	10.5038	4.52356	7.18982	7.57743	7.85175
TCGA.DS.A1OD	0	TCGA-DS-A1OD	3874	0	3874	9.75989	9.64746	11.7657	9.02514	6.22882	3.16993	5.49185	5.67243	1	10.1812	9.97298	5.39232	8.17493	7.78136	9.49785
TCGA.EA.A4BA	0	TCGA-EA-A4BA	755	0	755	4.90689	11.4435	9.90238	6.61471	12.2874	2.32193	9.7211	12.817	11.4247	8.5812	3.32193	5.2854	6.62936	7.55459	6.37504
TCGA.EA.A6QX	0	TCGA-EA-A6QX	730	0	730	13.8329	13.492	10.0126	7.67243	4	1.58496	8.25267	2	0	10.5622	12.7438	5.12928	5.32193	5.72792	4.52356
TCGA.FU.A57G	0	TCGA-FU-A57G	1078	0	1078	0	9.30834	11.5948	8.72451	11.9841	4.08746	11.1491	9.3015	11.2046	6.64386	2.80735	6.98868	5.61471	9.55459	7.71425
TCGA.IR.A3LH	0	TCGA-IR-A3LH	2394	0	2394	3.32193	12.8222	14.4602	9.46761	6.62936	1.58496	5.78136	8.65105	3	12.2837	8.06609	5.85798	7.19967	8.87344	5.88264
TCGA.C5.A1MI	1	TCGA-C5-A1MI	1083	1	1083	4.45943	13.5517	11.0835	8.3837	5.9542	6.96578	4.45943	2	2.80735	10.8681	6.26679	7.24793	5.9542	9.10852	10.0265
TCGA.DG.A2KJ	0	TCGA-DG-A2KJ	2893	0	2893	0	5.97728	9.11894	5.32193	10.6466	3.45943	8.45943	3	9.87191	5.67243	5.90689	0	3.45943	2.32193	7.25739
TCGA.EA.A411	0	TCGA-EA-A411	747	0	747	8.60733	13.7971	12.2726	8.41785	12.3834	4.9542	3	6.71425	2.58496	11.4231	9.36194	6.98868	7.87652	10.1189	7.01123
TCGA.EA.A439	0	TCGA-EA-A439	965	0	965	9.65821	9.62571	13.4558	8.82972	7.40939	10.7624	8.81378	9.43045	2.58496	11.4949	7.47573	6.90689	4.16993	10.4686	9.31061
TCGA.MA.AA3X	0	TCGA-MA-AA3X	595	0	595	8.67243	14.1973	9.15735	8.62205	8.13443	5.49185	2	4.32193	1	8.88264	8.6865	5.08746	6.55459	6.96578	6.56986
TCGA.VS.A9V5	1	TCGA-VS-A9V5	494	1	494	2.32193	12.4362	12.511	7.37504	10.2738	2	11.8142	9.83289	10.9708	9.96145	7.65105	5.24793	10.93	5.08746	9.71253
TCGA.2W.A8YY	0	TCGA-2W-A8YY	533	0	533	1.58496	11.7678	10.888	7.85175	6.08746	4.70044	9.63662	9.91588	9.21675	6.47573	2	6	5.2854	6.74147	3.70044
TCGA.DG.A2KK	0	TCGA-DG-A2KK	2496	0	2496	9.32867	13.3151	11.9915	7.70044	12.1592	2	10.8857	8.21432	2.58496	10.9001	12.8114	4.64386	5.08746	4.70044	8.88874
TCGA.DS.A0VM	0	TCGA-DS-A0VM	2128	0	2128	9.73809	14.0243	12.4582	8.43045	5.83289	2	9.81698	8.31288	2.58496	9.91737	10.8971	4.16993	10.4574	9.94398	5.55459
TCGA.EA.A410	0	TCGA-EA-A410	803	0	803	2.80735	7.60733	10.032	7	7.63662	9.73132	7.67243	10.2192	9.94983	7.33985	3	8.79442	3	9.13699	8.76487
TCGA.EK.A2RJ	0	TCGA-EK-A2RJ	53	0	53	0	10.2252	12.0664	7.77479	4.24793	1	8.19476	3.32193	0	7.45943	4.08746	5.2854	4.64386	11.0286	9.04439
TCGA.HM.A4S6	0	TCGA-HM-A4S6	454	0	454	2	13.6039	9.53138	9.36413	4.16993	2	0	2	1	8.76818	10.697	5.72792	5.24793	6.90689	7.03342
TCGA.VS.A8QC	1	TCGA-VS-A8QC	350	1	350	12.1478	14.55	10.1972	8.7211	6.44294	2.58496	9.89178	5.2854	1.58496	10.6609	11.3315	4.58496	5.42626	8.32643	5.35755
TCGA.VS.AA62	1	TCGA-VS-AA62	469	1	469	0	11.4019	12.444	8.31741	4.52356	1	7.74819	6.70044	2	7.89482	5.85798	7.63662	7.80735	11.0654	8.09803
TCGA.VS.A9U6	0	TCGA-VS-A9U6	1320	0	1320	3.32193	14.5499	11.9661	9.02791	4.90689	7.61471	7.7879	8.74483	2.32193	8.86419	10.4231	5.24793	9.60177	8.58871	5.32193
TCGA.BI.A0VR	0	TCGA-BI-A0VR	1505	0	1505	12.3969	13.525	11.8198	9.57932	5.32193	1.58496	6.79442	6.91886	1.58496	9.88722	11.7138	5.78136	5.72792	8.24793	7.80735
TCGA.C5.A1M5	1	TCGA-C5-A1M5	2052	1	2052	14.2976	12.0112	11.8727	7.62936	6.20945	1.58496	5.42626	8.33985	2	10.9016	7.30378	9.08481	5.72792	7.5157	9.68299
TCGA.DG.A2KL	0	TCGA-DG-A2KL	1367	0	1367	11.6316	13.3036	11.2866	8.18982	6.83289	5.52356	5.49185	7.20945	1	10.7499	10.0238	7.11894	7.53916	11.2784	6.52356
TCGA.DR.A0ZL	0	TCGA-DR-A0ZL	2669	0	2669	9.34207	12.681	11.2969	7.80735	4.70044	0	10.7237	9.18982	3	10.043	10.4346	3.58496	6.55459	5.78136	3.80735
TCGA.IR.A3LB	1	TCGA-IR-A3LB	2032	1	2032	0	13.3674	12.5474	9.65821	8.32193	10.8138	11.3134	11.6922	11.2969	10.4019	5.88264	5.97728	5.20945	9.6987	8.82337
TCGA.JW.A5VH	1	TCGA-JW-A5VH	100	1	100	4.90689	7.40939	9.99152	9.63481	6.39232	1	3.32193	9.12928	2.58496	6.80735	3	6.12928	3.16993	12.6287	5
TCGA.LP.A7HU	0	TCGA-LP-A7HU	406	0	406	1	10.0485	10.2021	7.52356	4.80735	6.37504	2	2.32193	1	10.4625	8.89482	3.32193	4.16993	5.58496	9.15987
TCGA.VS.A9UH	0	TCGA-VS-A9UH	1427	0	1427	8.93074	11.9259	11.1904	9.45327	5.58496	0	1	9.81698	3.70044	10.218	7.45121	4.75489	7.39232	8.41363	4.08746
TCGA.VS.A9UR	0	TCGA-VS-A9UR	793	0	793	2.32193	13.3383	12.5904	8.11374	11.368	6.52356	10.0293	3.32193	0	10.255	11.1618	3.32193	5.12928	5.16993	9.67066
TCGA.C5.A2LX	0	TCGA-C5-A2LX	2526	0	2526	10.0593	9.85953	10.3859	8.40088	8.18982	1	9.10066	5.12928	2.58496	8.92184	10.3454	1	5.39232	6.30378	5.42626
TCGA.EA.A5ZE	0	TCGA-EA-A5ZE	829	0	829	6	11.7394	11.6564	5.80735	4.9542	1	1	3.32193	1	10.0553	4.32193	5.12928	5.16993	7.07682	5.39232
TCGA.EA.A78R	0	TCGA-EA-A78R	410	0	410	11.4954	10.3174	9.18239	4.52356	5.55459	0	5.12928	7.6865	3.32193	8.42206	3.70044	1	5.32193	6.06609	5.16993
TCGA.MA.AA3W	0	TCGA-MA-AA3W	685	0	685	10.3641	11.2258	11.7616	7.09803	3.70044	0	7.69349	3.58496	1	9.61287	9.75822	4	6.44294	6.08746	8.19476
TCGA.VS.A9UB	0	TCGA-VS-A9UB	911	0	911	0	11.2889	13.8425	7.37504	4.39232	0	8.73809	7.63662	2	10.2288	8.41363	3.58496	7.47573	8.67596	7.80735
TCGA.C5.A1M6	1	TCGA-C5-A1M6	955	1	955	6.90689	10.3454	12.2697	7.86419	10.8226	1	7.62205	7.67948	2.32193	10.5108	10.2444	4.52356	8.06609	7.92481	7.99435
TCGA.C5.A7CG	0	TCGA-C5-A7CG	6408	0	6408	13.5731	10.1059	11.4605	7.99435	5.88264	1.58496	2	3.80735	1.58496	10.888	1.58496	5.24793	5.64386	7.09803	7.33092
TCGA.C5.A7UH	0	TCGA-C5-A7UH	3988	0	3988	0	13.9596	12.3619	9.39874	8.02237	1	1.58496	10.623	2	9.08215	10.7415	5.12928	5.32193	6.71425	5
TCGA.FU.A3EO	0	TCGA-FU-A3EO	490	0	490	3	10.2633	10.4727	5.49185	13.0384	0	9.69174	8.75822	4.16993	8.61839	9.29002	0	6.71425	3.70044	8.0607
TCGA.FU.A3TQ	0	TCGA-FU-A3TQ	795	0	795	12.749	14.0689	11.062	7.89482	4.70044	6.97728	6.94251	5.49185	1.58496	11.4099	10.3174	5.83289	7.18982	7.07682	5.08746
TCGA.Q1.A6DT	1	TCGA-Q1-A6DT	275	1	275	2.80735	13.9411	11.6693	11.0091	4.9542	0	1.58496	9.68299	2.32193	9.67243	11.8388	3.16993	5.88264	4.85798	4.80735
TCGA.VS.A8EC	0	TCGA-VS-A8EC	1415	0	1415	12.0179	12.9218	11.4605	7.46761	3	0	10.8517	3.45943	1.58496	11.7112	8.58496	3.70044	4.58496	4.58496	4.52356
TCGA.VS.A9UJ	1	TCGA-VS-A9UJ	52	1	52	1.58496	13.2293	10.8361	6.71425	10.9549	0	13.3351	11.3264	3.80735	7.24793	7.94251	5.2854	2.80735	5.9542	5.49185
TCGA.C5.A2M2	1	TCGA-C5-A2M2	1011	1	1011	1.58496	7.49185	12.9848	6.18982	13.0803	6.33985	10.6448	10.5362	2.32193	10.676	10.6724	3.45943	3.45943	4.80735	3.58496
TCGA.C5.A8YR	1	TCGA-C5-A8YR	837	1	837	0	9.46557	13.1306	9.49586	4.64386	5.52356	2	3.58496	2	8.47168	5.52356	4.08746	2.80735	9.80413	2.58496
TCGA.EA.A5ZF	0	TCGA-EA-A5ZF	828	0	828	12.5211	7.93664	11.4843	8.73471	10.4898	7.97154	5.52356	7.46761	3.80735	10.3509	11.0947	5.58496	6.02237	7.92481	8.24793
TCGA.JW.A5VJ	0	TCGA-JW-A5VJ	652	0	652	6.6865	15.0298	10.5784	8.65821	3.90689	1.58496	9.27146	8.07682	1	9.84078	9.23362	4.16993	7.30378	6.2854	5.32193
TCGA.Q1.A5R3	0	TCGA-Q1-A5R3	485	0	485	8.47573	11.0728	9.07682	3.90689	6.82018	0	9.94544	8.15987	4.75489	9.80896	12.8329	4.45943	7.49985	4.45943	9.40088
TCGA.VS.A8EH	0	TCGA-VS-A8EH	986	0	986	15.1553	14.56	10.5177	8.59991	3.70044	1	9.2384	3.45943	5.49185	8.84235	8.55842	3	6	3.70044	4.32193
TCGA.EA.A3HR	0	TCGA-EA-A3HR	940	0	940	12.7067	15.3457	11.7773	8.60363	7.93074	6.24793	8.93074	9.33316	5.39232	9.88417	7.01123	5.80735	5	7.7211	8.40939
TCGA.VS.A9U5	0	TCGA-VS-A9U5	1535	0	1535	11.188	12.5233	10.4757	7.53916	3.45943	0	10.9571	10.9944	1.58496	9.47168	9.50581	4.64386	4.52356	5.08746	4.24793
TCGA.WL.A834	0	TCGA-WL-A834	791	0	791	11.5746	12.6309	11.8826	8.92778	3.90689	2.58496	9.51964	9.99435	2.80735	8.51964	12.4846	4.9542	4.08746	8.26679	4
TCGA.C5.A7CK	1	TCGA-C5-A7CK	4086	1	4086	12.0293	15.2979	12.3298	9.53528	6.20945	1	12.2955	9.45943	0	9.77479	6.62936	6.44294	4.24793	9.04712	6.56986
TCGA.EX.A1H5	0	TCGA-EX-A1H5	619	0	619	13.4336	13.5434	9.18735	5.72792	4.90689	2	10.6138	4.39232	2.32193	10.3869	10.2668	4.24793	3.90689	6.04439	8.93074
TCGA.VS.A9V0	0	TCGA-VS-A9V0	573	0	573	1.58496	8.93958	9.15735	4.16993	10.4584	7.61471	7.71425	10.3219	8.52748	6.59991	5.04439	3.90689	3.32193	5.35755	7.48382
TCGA.EA.A3QD	0	TCGA-EA-A3QD	397	0	397	1	11.7744	10.9091	7.7879	6.02237	0	0	8.70736	2	10.29	10.6266	5.39232	6.40939	7.19967	5.70044
TCGA.EA.A5FO	0	TCGA-EA-A5FO	815	0	815	13.6508	13.0708	10.0196	5.72792	9.43463	1	1.58496	8.32193	2.32193	9.50978	5.16993	1	4.08746	2.58496	9.24555
TCGA.EA.A3HQ	0	TCGA-EA-A3HQ	1136	0	1136	14.7453	12.2414	11.0279	8.18488	5.83289	1.58496	2	6.47573	3.16993	11.4247	13.0627	6.24793	6.61471	8.79766	5.08746
TCGA.FU.A23L	0	TCGA-FU-A23L	725	0	725	12.2098	12.5155	12.9209	6.94251	5.78136	5.16993	8.29002	11.1053	4.39232	11.3078	8.28077	8.8857	8.03342	8.56224	9.04166
TCGA.IR.A3LA	0	TCGA-IR-A3LA	4172	0	4172	6.24793	8.224	13.0597	5.70044	12.2822	2.32193	7.86419	1	5.12928	9.16491	4.80735	5.49185	10.3772	6.9542	7.57743
TCGA.IR.A3LL	0	TCGA-IR-A3LL	1106	0	1106	5.20945	10.0293	9.19229	6.58496	4.80735	0	2.80735	2.32193	2	9.99718	10.4136	1	4.45943	6.02237	3.70044
TCGA.MU.A5YI	0	TCGA-MU-A5YI	1053	0	1053	9.17243	12.6578	12.1926	8.55459	6.93074	1	1.58496	6.35755	1.58496	10.0901	8.58496	8.62205	6.12928	8.94837	7.01123
TCGA.VS.A8EJ	1	TCGA-VS-A8EJ	607	1	607	3.16993	11.5152	10.7099	5.12928	11.6896	7.13955	3.90689	7.58496	1	9.24793	7.31288	3.80735	3.32193	6.04439	6.35755
TCGA.DR.A0ZM	0	TCGA-DR-A0ZM	1791	0	1791	7.60733	10.2562	9.14211	7.9542	4.58496	8.21432	3.32193	1.58496	1	8.37938	6.30378	2.32193	4.08746	7.98299	5.90689
TCGA.VS.A9UZ	0	TCGA-VS-A9UZ	2044	0	2044	2.58496	9.18735	11.8174	4.64386	12.4473	3.32193	11.6344	4.90689	5.75489	10.2021	11.6839	5.2854	4.85798	5.67243	8.45121
TCGA.EX.A69M	1	TCGA-EX-A69M	253	1	253	5.16993	8.88874	12.0196	5.32193	4.52356	0	4	1	1	8.31288	5.70044	4.70044	4.70044	5.72792	4.32193
TCGA.MY.A5BD	0	TCGA-MY-A5BD	1667	0	1667	5.45943	10.0553	11.2521	6.59991	13.0298	8.44708	10.6519	9.71596	2.80735	10.4594	7.01123	1.58496	3.45943	9.03067	7.88874
TCGA.VS.A9V3	0	TCGA-VS-A9V3	540	0	540	10.4522	13.1884	8.43463	8.33092	3.58496	2.58496	0	2	0	8.98584	8.96578	4.9542	4.64386	6.30378	7.25739
TCGA.JX.A3Q0	0	TCGA-JX-A3Q0	6375	0	6375	14.3955	12.3509	9.43463	8.15987	8.89785	1.58496	0	2.32193	1	9.50383	8.49586	5.85798	4.9542	5.42626	2.80735
TCGA.VS.A953	1	TCGA-VS-A953	477	1	477	6.18982	13.2713	11.4252	8.06609	3.70044	7.7879	2	10.0661	1	11.1787	2.32193	3.32193	8.86728	9.57554	0
TCGA.VS.A9V4	1	TCGA-VS-A9V4	132	1	132	1.58496	9.32193	10.933	5.67243	8.15482	4.45943	10.0688	11.7665	10.388	5.42626	0	3.16993	5.42626	5.35755	6.85798
TCGA.EK.A2GZ	0	TCGA-EK-A2GZ	383	0	383	8.12928	14.3782	10.733	9.53528	3.32193	1	10.6751	12.4579	1	10.2691	11.8349	9.13699	9.46964	5.20945	4.24793
TCGA.FU.A3HZ	0	TCGA-FU-A3HZ	1103	0	1103	6.39232	9.48583	8.92778	6.26679	6.47573	0	6.56986	6.85798	2	6.91886	2	5.20945	6.67243	10.6284	3.16993
TCGA.HM.A3JK	0	TCGA-HM-A3JK	632	0	632	11.5985	11.4507	9.92481	7.62936	6.62936	5	3.70044	4.24793	2	8.73809	10.4919	5.67243	6.97728	8.21432	7.76155
TCGA.IR.A3LF	0	TCGA-IR-A3LF	2949	0	2949	2.32193	11.2755	12.136	7.80735	13.2949	9.50184	10.3729	10.2574	10.8017	10.3619	10.84	6.08746	5.90689	6.98868	10.8049
TCGA.Q1.A5R2	0	TCGA-Q1-A5R2	499	0	499	11.2963	12.3015	8.97441	6.84549	4.24793	1.58496	7.76818	3.32193	0	9	10.3576	2	2.32193	4.39232	3.32193
TCGA.VS.A957	0	TCGA-VS-A957	1688	0	1688	8.15987	11.8325	9.85798	6.78136	1.58496	5.67243	8.46352	2.80735	1	9.10852	9.43463	2.32193	2.32193	4.24793	7.29462
TCGA.ZJ.AAXA	0	TCGA-ZJ-AAXA	43	0	43	11.5127	14.999	9.17991	8	7.45943	0	2.58496	5.39232	1.58496	8.62205	11.8114	5.85798	7.40088	8.19967	6.50779
TCGA.ZX.AA5X	0	TCGA-ZX-AA5X	119	0	119	9.43463	12.4112	11.4732	8.83289	5.67243	0	1.58496	5.80735	1	8.77149	9.30834	6.39232	6.82018	8.19476	8.10329
TCGA.C5.A2LZ	1	TCGA-C5-A2LZ	3046	1	3046	13.7574	14.1685	10.9844	7.16993	4.45943	5.75489	8.96578	5.70044	1	10.3805	11.5236	3.16993	6.32193	5.24793	8.29462
TCGA.VS.A8EK	1	TCGA-VS-A8EK	829	1	829	12.6843	13.5468	10.9366	7.16993	3.45943	1	9.37938	6.47573	2.32193	11.1611	12.2805	4.32193	5.32193	5.04439	8.91588
TCGA.VS.A952	0	TCGA-VS-A952	1778	0	1778	0	11.117	11.9399	5.2854	10.6147	5.75489	10.8681	1.58496	8.97441	10.0293	9.44708	4.80735	5.42626	4.39232	9.47573
TCGA.VS.A954	0	TCGA-VS-A954	1714	0	1714	12.6096	13.6076	9.19967	7.81378	4.24793	2	7.21917	2.58496	1.58496	8.42626	10.4336	2.32193	2.58496	7.90689	8.24317
TCGA.C5.A7CO	0	TCGA-C5-A7CO	4482	0	4482	12.6477	13.4053	10.9418	5.42626	3.45943	4.24793	8.46761	9.2503	1	9.91289	11.0119	4.08746	3.80735	4	8.33539
TCGA.EA.A3HT	0	TCGA-EA-A3HT	954	0	954	11.9281	14.0073	11.279	8.59991	6.74147	3	7.33985	6.02237	1	10.1636	11.7194	6.16993	7.2854	10.7117	9.19229
TCGA.MY.A5BF	0	TCGA-MY-A5BF	634	0	634	3	12.4075	9.78627	8.60363	3.16993	1	4.9542	3.45943	1	10.8788	9.30834	2	5.04439	5.04439	5.12928
TCGA.C5.A8XI	0	TCGA-C5-A8XI	254	0	254	12.5345	11.1039	11.5934	7.04439	4.85798	4.52356	7.8392	7.76155	3.32193	10.1898	5.97728	4.24793	4.24793	8.29462	9.93958
TCGA.IR.A3LK	1	TCGA-IR-A3LK	908	1	908	1.58496	13.0331	12.0644	9.89936	9.68475	1.58496	0	8.25267	1.58496	12.0505	11.0437	4.70044	7.93074	4.52356	8.93369
TCGA.C5.A7X3	1	TCGA-C5-A7X3	284	1	284	0	12.6402	11.7266	9.17243	4.75489	2	3	7.43463	3.32193	7.76818	5.64386	3.16993	7.73471	11.5231	8.31288
TCGA.C5.A1MH	1	TCGA-C5-A1MH	1186	1	1186	12.5843	10.3443	11.1459	9.60733	6.10852	5.72792	1.58496	3.80735	1.58496	10.0941	9.40939	5.55459	7.70736	7.63662	5.85798
TCGA.C5.A7X5	1	TCGA-C5-A7X5	414	1	414	2.32193	14.5294	11.9407	8.60363	4.52356	2	3.16993	15.6015	1	9.63844	11.2894	4.39232	7.25739	7.56986	3.16993
TCGA.VS.A9UT	0	TCGA-VS-A9UT	482	0	482	0	7.85798	11.4553	8.25739	10.0485	3	9.02514	12.1273	9.53916	8.26209	8.51175	4.90689	6.55459	5.75489	7.2854
TCGA.VS.A9UD	0	TCGA-VS-A9UD	739	0	739	2.80735	9.90388	8.3837	6.30378	4.39232	4.58496	1	4.90689	0	8.62936	8.42626	1.58496	6.2854	1	2.80735
TCGA.C5.A8XJ	0	TCGA-C5-A8XJ	4467	0	4467	3.90689	13.5812	11.8353	8.2854	4.85798	3.45943	3.90689	9.41574	2.32193	9.31061	8.72451	6.02237	10.1085	8.37069	5.70044
TCGA.EK.A2RA	0	TCGA-EK-A2RA	1246	0	1246	7.49185	11.7997	11.9318	9.33316	4.24793	0	1	6.33985	1	9.92184	6.6865	3.70044	11.3117	5.32193	5.80735
TCGA.VS.A9UV	1	TCGA-VS-A9UV	104	1	104	11.42	12.512	8.69349	6.02237	4.24793	1.58496	6	1.58496	0	10.7108	6.18982	4.16993	1.58496	4.08746	3.70044
TCGA.DS.A1O9	1	TCGA-DS-A1O9	266	1	266	12.6243	13.8307	11.224	9.46964	6.47573	3.58496	2	3.58496	2.32193	11.3548	3.32193	4.9542	7.3837	9.09803	5.12928
TCGA.MA.AA42	0	TCGA-MA-AA42	259	0	259	13.0718	8.07682	10.9447	6.79442	3.45943	0	2.80735	6.58496	1	10.1111	10.4242	3.58496	4.70044	2.80735	2.32193
TCGA.C5.A3HL	0	TCGA-C5-A3HL	621	0	621	12.4898	13.613	11.2342	6.89482	3.70044	2.80735	5.35755	5.88264	0	11.5362	12.1836	4.52356	4.52356	9.02514	7.81378
TCGA.VS.A8QH	1	TCGA-VS-A8QH	1210	1	1210	1.58496	10.6715	11.7887	7.27612	7.39232	1.58496	11.6667	8.18982	10.1306	7.57743	4.39232	5.49185	2.58496	7.15987	4.45943
TCGA.VS.A959	0	TCGA-VS-A959	1561	0	1561	6.04439	10.7566	10.9403	6.20945	3.45943	1	3.16993	3.58496	0	8.12928	11.0587	5.04439	9.25503	6.75489	8.22882
TCGA.VS.A9UI	1	TCGA-VS-A9UI	1372	1	1372	7.62205	11.7723	7.70736	7.2384	2.80735	3.90689	0	1.58496	0	7.24793	6.42626	4.45943	4.08746	5.90689	8.31288
TCGA.DS.A1OA	1	TCGA-DS-A1OA	879	1	879	14.8603	13.2556	11.5999	10.9374	5.04439	0	7.67948	6.85798	2	9.72281	9.13699	4.85798	5.35755	9.15987	5.61471
TCGA.C5.A1BM	1	TCGA-C5-A1BM	2520	1	2520	10.6618	14.4708	10.6644	9.31741	4.52356	3.32193	8.11374	5.12928	2	10.2033	6.37504	5.55459	4.45943	7.62936	6
TCGA.FU.A3TX	0	TCGA-FU-A3TX	45	0	45	1.58496	7	12.8449	10.8455	5.08746	3.45943	12.4165	3.32193	2.80735	10.722	4.75489	4.64386	5.16993	7.04439	4.16993
TCGA.C5.A1MK	1	TCGA-C5-A1MK	74	1	74	8.33985	13.6631	10.2288	7.33985	6.42626	2.80735	2.32193	6.18982	1	7.85798	8.29002	5.49185	9.01402	8.87036	8.42626
TCGA.C5.A8YQ	1	TCGA-C5-A8YQ	715	1	715	5.85798	11.1523	13.5806	8.48382	3.80735	0	8.33539	2.32193	3.32193	9.29462	1.58496	4.52356	3.90689	6.70044	4.75489
TCGA.VS.A8Q9	0	TCGA-VS-A8Q9	1630	0	1630	1.58496	12.1102	11.93	9.67243	4.85798	1	6.16993	1	4.80735	10.0485	2	7.19967	4.90689	4.39232	4.85798
TCGA.VS.A9UL	1	TCGA-VS-A9UL	442	1	442	3.90689	8.35315	10.567	5.93074	10.4409	9.32867	2.32193	6.91886	0	7.34873	5.93074	4.80735	4.52356	9.62571	10.1787
TCGA.DS.A5RQ	0	TCGA-DS-A5RQ	512	0	512	13.6222	13.64	10.5324	9.88722	6.42626	0	6.88264	4.16993	4.52356	10.3977	10.5196	3.45943	6.16993	4.9542	4
TCGA.EK.A2PG	0	TCGA-EK-A2PG	46	0	46	10.1611	13.1759	11.2969	7	5.04439	1	6.10852	3.32193	3.70044	8.32643	5.93074	0	4.58496	3.80735	2.32193
